# Supplementary material for: Potential conflict between future development of natural resources and high-value wildlife habitats in boreal landscapes
Source: Springer Nature journal article supplement (doi:10.1007/s10531-016-1219-2), 2016-10-21
Supplement: MOESM1 [file 10955382]

# **Potential Conflict between Future Development of Natural Resources and High-Value Wildlife Habitats in Boreal Landscapes**

## **Biodiversity and Conservation**

**Nobuya Suzuki<sup>1</sup>, Katherine L. Parker<sup>1</sup>**

<sup>1</sup>Natural Resources and Environmental Studies Institute, University of Northern British Columbia, 3333 University Way, Prince George, BC V2N 4Z9, Canada

Nobuya Suzuki (Corresponding Author)  
Email: [nobi.suzuki@unbc.ca](mailto:nobi.suzuki@unbc.ca)

### **Online Resource 1. Habitat Suitability Maps**

Fig. S1.1 Habitat Suitability for Caribou, Moose, and Elk

Fig. S1.2 Habitat Suitability for Stone's Sheep and Mountain Goats

Fig. S1.3 Habitat Suitability for Wolves and Grizzly Bears

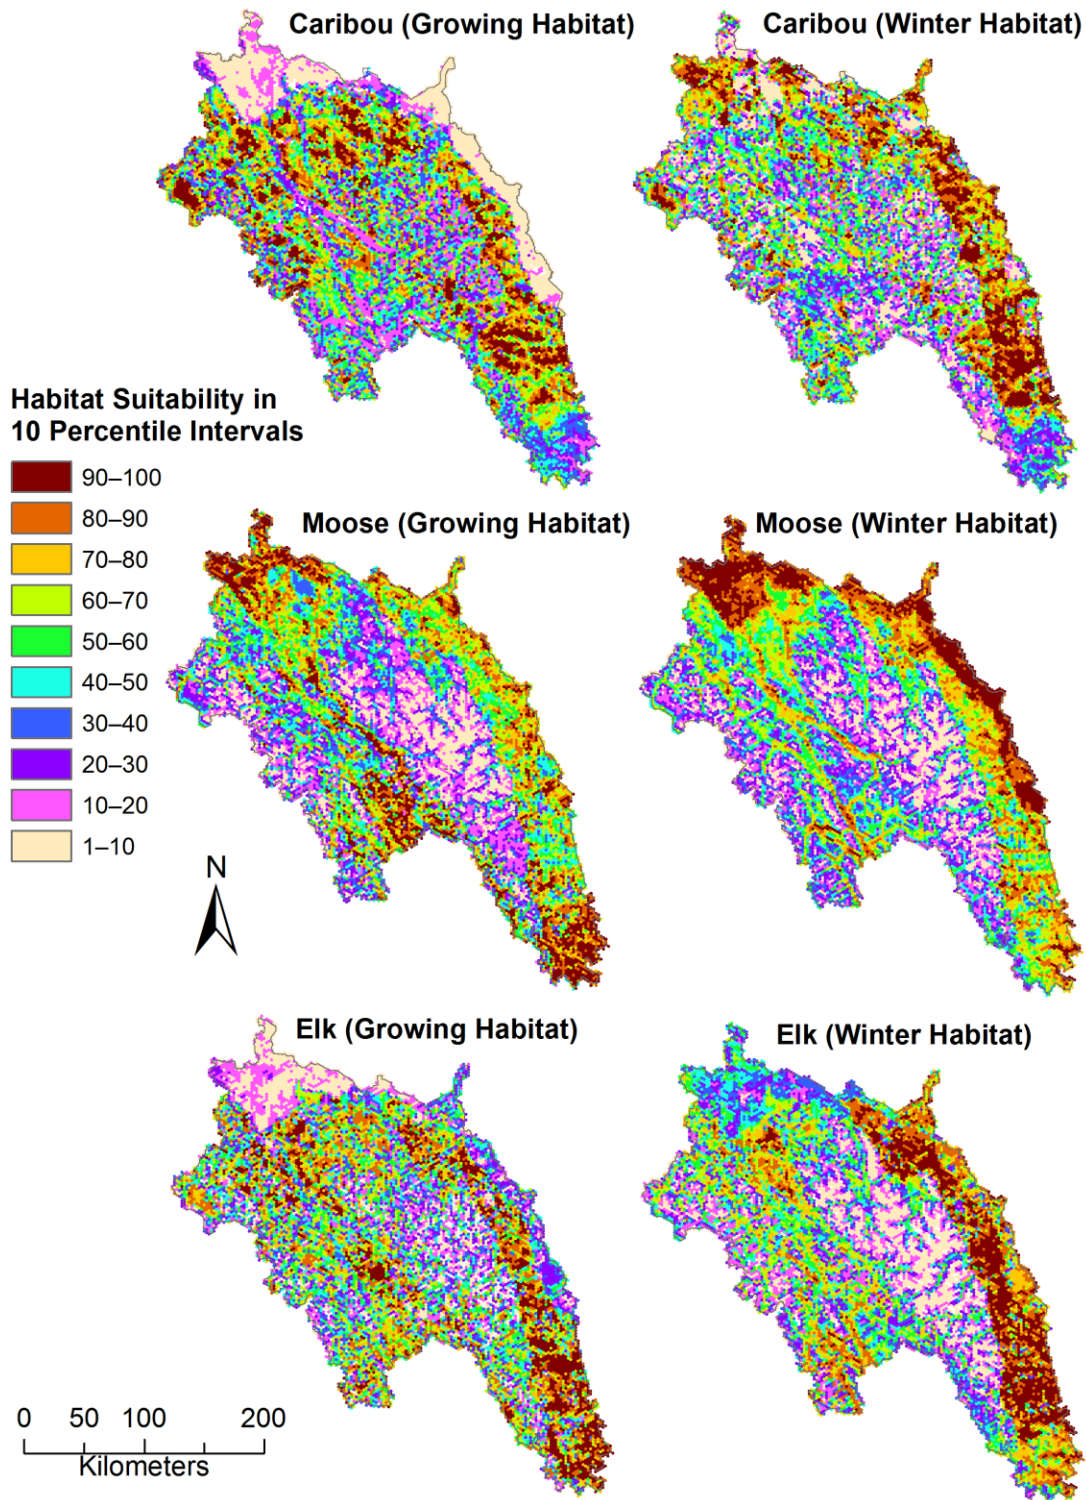

**Fig. S1.1** Habitat suitability for caribou, moose, and elk in the growing and winter seasons at the planning unit scale (500 ha) in the Muskwa-Kechika Management Area, northeast British Columbia. Habitat suitability for planning units was calculated based on models by Heinemeyer et al. (2004). The unit of habitat suitability is in percentiles (1-100), and the top 30percentiles (70-100) were assigned as high-value habitat in this study

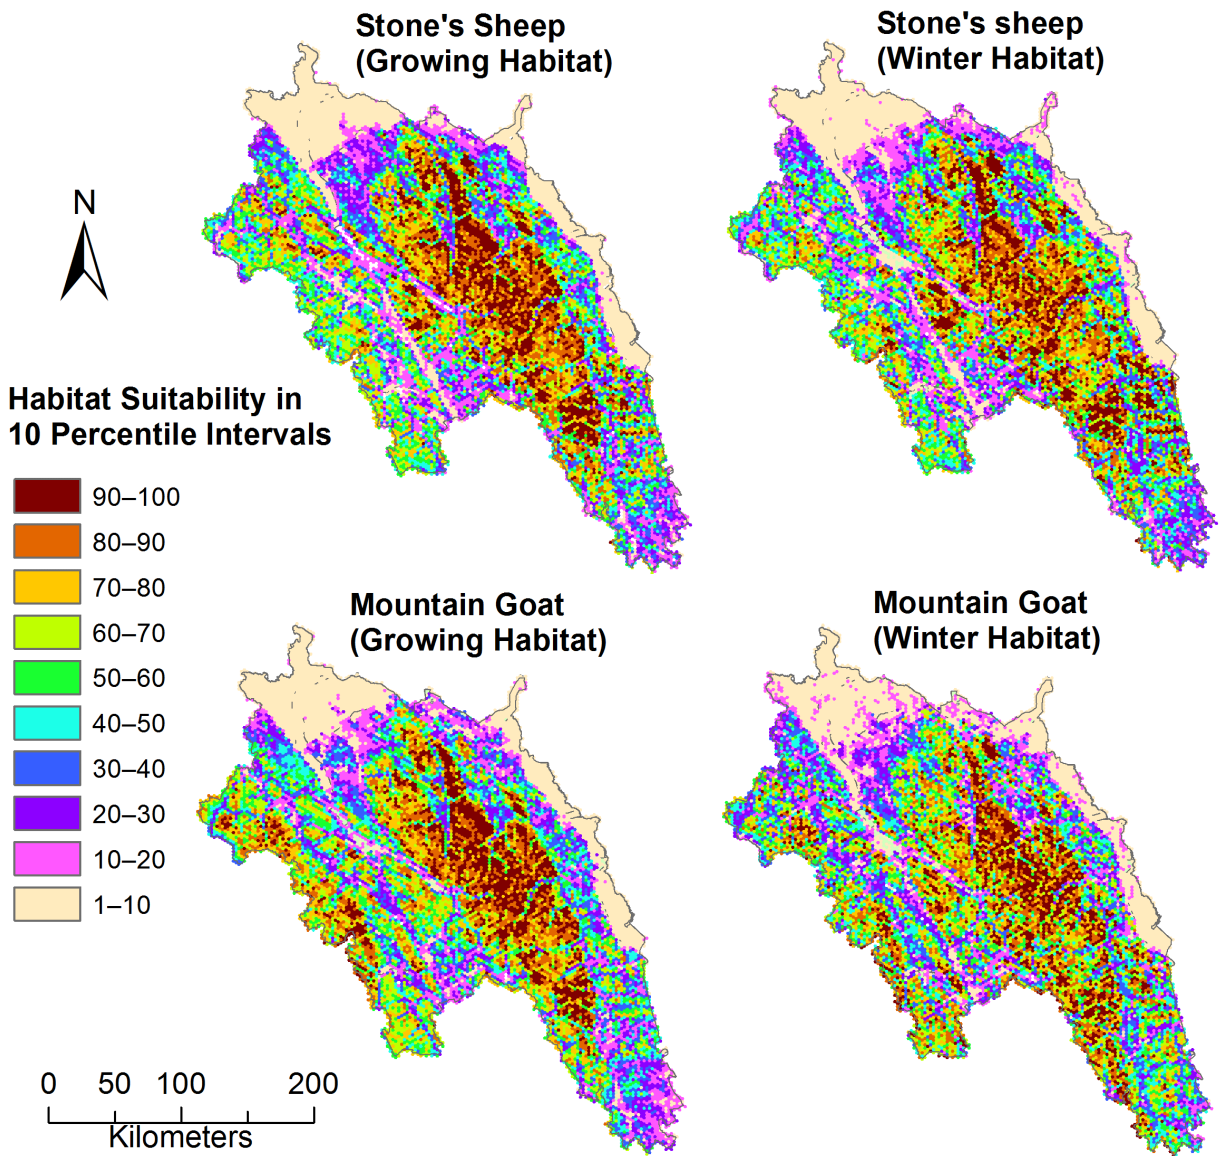

**Fig. S1.2** Habitat suitability for Stone’s sheep and mountain goats in the growing and winter seasons at the planning unit scale (500 ha) in the Muskwa-Kechika Management Area, northeast British Columbia. Habitat suitability for planning units was calculated based on models by Heinemeyer et al. (2004). The unit of habitat suitability is in percentiles (1-100), and the top 30 percentiles (70-100) were assigned as high-value habitat in this study

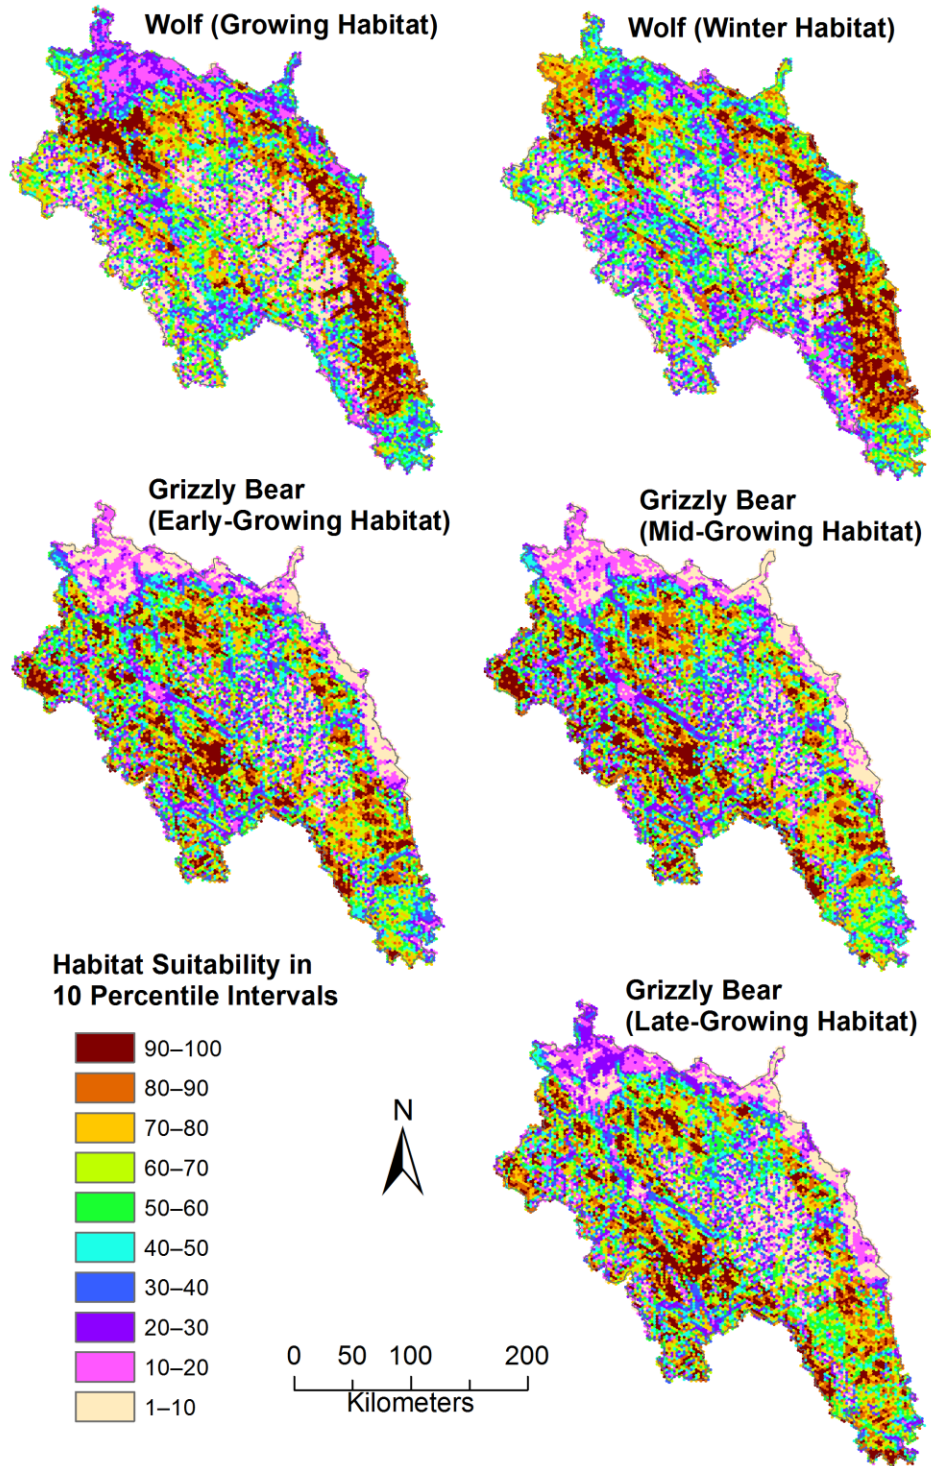

**Fig. S1.3** Habitat suitability for wolves in the growing and winter habitats and grizzly bears in the early-growing, mid-growing, and late-growing seasons at the planning unit scale (500 ha) in the Muskwa-Kechika Management Area, northeast British Columbia. Habitat suitability for planning units was calculated based on models by Heinemeyer et al. (2004). The unit of habitat suitability is in percentiles (1-100), and the top 30 percentiles (70-100) were assigned as high-value habitat in this study

## Reference

Heinemeyer K, Tingey R, Ciruna K, Lind T, Pollock J, Butterfield B, Griggs J, Lachetti P, Bode C, Olenicki T, Parkinson E, Rumsey C, Sizemore D (2004) Conservation area design for the Muskwa-Kechika Management Area. Prepared for the British Columbia Ministry of Sustainable Resource Management. Available at [http://www.roundriver.org/wp-content/uploads/pubs/MK/reports/MK\\_CAD\\_V1.pdf](http://www.roundriver.org/wp-content/uploads/pubs/MK/reports/MK_CAD_V1.pdf)
