# Supplementary material for: Potential conflict between future development of natural resources and high-value wildlife habitats in boreal landscapes
Source: Springer Nature journal article supplement (doi:10.1007/s10531-016-1219-2), 2016-10-21
Supplement: MOESM7 [file 10955382]

# **Potential Conflict between Future Development of Natural Resources and High-Value Wildlife Habitats in Boreal Landscapes**

## **Biodiversity and Conservation**

**Nobuya Suzuki<sup>1</sup>, Katherine L. Parker<sup>1</sup>**

<sup>1</sup>Natural Resources and Environmental Studies Institute, University of Northern British Columbia, 3333 University Way, Prince George, BC V2N 4Z9, Canada

Nobuya Suzuki (Corresponding Author)  
Email: nobi.suzuki@unbc.ca

### **Online Resource 7. High-Value Wildlife Habitats, Resource Potentials, and their Overlap in the Muskwa-Kechika Management Area, northeast British Columbia.**

I. Percent areas of high-value habitats of 7 large mammal species by season in Special Resource Management Zones of the Muskwa-Kechika Management Area overlapping areas with different levels of:

- 1) cumulative resource potential (Table S7.1)
- 2) resource potential diversity (Table S7.2)
- 3) road potential (Table S7.3)
- 4) forest resource potential (Table S7.4)
- 5) oil and gas potential (Table S7.5)
- 6) mineral potential (Table S7.6)
- 7) wind power potential (Table S7.7)

II. Areas of high resource potential within Special Resource Management Zones, expressed as % area of the entire Muskwa-Kechika Management Area (Table S7.8)

III. Areas of overlap between high-value habitats by season for 7 species of large mammals and high resource potentials in Special Resource Management Zones, expressed as % area of the entire Muskwa-Kechika Management Area for:

- 1) cumulative resource potential, resource potential diversity, and road potential (Table S7.9)
- 2) forest resources, oil and gas, minerals, and wind power (Table S7.10)

Table S7.1 Area (%) of high-value habitats in 10 classes of cumulative resource potential within Special Resource Management Zones of the Muskwa-Kechika Management Area, northeast British Columbia, Canada. High-value habitat is assigned to the top 30 percentiles of habitat suitability among 500-ha planning units across the entire land area of the Muskwa-Kechika Management Area

| Species <sup>a</sup> | Seasonal habitat <sup>b</sup> | Cumulative Resource Potential (10 percentile interval) <sup>c</sup> |       |       |       |       |       |       |       |       |        |
|----------------------|-------------------------------|---------------------------------------------------------------------|-------|-------|-------|-------|-------|-------|-------|-------|--------|
|                      |                               | 0–10                                                                | 10–20 | 20–30 | 30–40 | 40–50 | 50–60 | 60–70 | 70–80 | 80–90 | 90–100 |
| Wolf                 | Growing                       | 5.4                                                                 | 4.9   | 4.8   | 10.2  | 12.2  | 13.0  | 14.5  | 13.9  | 13.3  | 8.0    |
|                      | Winter                        | 3.3                                                                 | 2.9   | 2.4   | 6.6   | 8.2   | 12.2  | 15.6  | 17.4  | 17.0  | 14.4   |
| Grizzly              | Early-Gr                      | 9.0                                                                 | 9.8   | 8.4   | 11.9  | 15.1  | 13.8  | 12.0  | 10.9  | 7.0   | 2.1    |
|                      | Mid-Gr                        | 8.9                                                                 | 9.4   | 8.3   | 11.6  | 15.5  | 14.1  | 12.3  | 10.9  | 7.1   | 1.8    |
|                      | Late-Gr                       | 7.2                                                                 | 6.0   | 6.1   | 10.2  | 13.8  | 15.0  | 14.7  | 12.9  | 10.3  | 4.0    |
| Elk                  | Growing                       | 5.0                                                                 | 6.3   | 5.5   | 9.8   | 11.9  | 12.0  | 14.1  | 12.6  | 12.9  | 9.8    |
|                      | Winter                        | 1.2                                                                 | 2.1   | 1.6   | 5.3   | 6.6   | 11.3  | 14.2  | 14.9  | 18.6  | 24.2   |
| Moose                | Growing                       | 0.4                                                                 | 0.7   | 0.7   | 3.1   | 7.0   | 10.5  | 14.5  | 17.6  | 20.8  | 24.6   |
|                      | Winter                        | 0.2                                                                 | 0.6   | 0.4   | 2.4   | 5.1   | 7.9   | 13.3  | 17.1  | 23.4  | 29.6   |
| Caribou              | Growing                       | 10.4                                                                | 12.2  | 11.4  | 13.4  | 14.4  | 11.5  | 10.4  | 9.0   | 5.5   | 1.8    |
|                      | Winter                        | 3.8                                                                 | 5.4   | 4.7   | 5.4   | 6.7   | 9.0   | 11.9  | 15.9  | 17.0  | 20.2   |
| Goat                 | Growing                       | 16.9                                                                | 26.0  | 25.6  | 17.0  | 9.0   | 3.5   | 1.4   | 0.6   | 0.0   | 0.0    |
|                      | Winter                        | 12.1                                                                | 19.9  | 22.8  | 16.8  | 12.1  | 8.3   | 4.4   | 2.9   | 0.7   | 0.1    |
| Sheep                | Growing                       | 11.9                                                                | 22.9  | 24.0  | 16.4  | 12.1  | 7.0   | 3.9   | 1.6   | 0.2   | 0.0    |
|                      | Winter                        | 10.2                                                                | 19.8  | 22.1  | 15.5  | 12.3  | 8.5   | 6.4   | 4.1   | 1.1   | 0.0    |

<sup>a</sup> Wolf = Gray Wolf, Grizzly = Grizzly Bear, Elk = Rocky Mountain Elk, Caribou = Woodland Caribou, Goat = Mountain Goat, Sheep = Stone's sheep

<sup>b</sup> Winter = winter habitat, Growing = growing-season habitat, Early-Gr = early-growing habitat, Mid-Gr = mid-growing habitat, Late-Gr = late-growing habitat

<sup>c</sup> Ten classes of cumulative resource potential with 10 percentile intervals, where the class 0–10 percentiles represents the lowest resource potential and the class 90–100 percentiles represents the highest resource potential. Cumulative resource potential is the sum of resource potentials among forest resources, oil and gas, mineral, and wind power

Table S7.2 Area (%) of high-value habitats in 10 classes of resource potential diversity within Special Resource Management Zones of the Muskwa-Kechika Management Area, northeast British Columbia, Canada. High-value habitat is assigned to the top 30 percentiles of habitat suitability among 500-ha planning units across the entire land area of the Muskwa-Kechika Management Area

| Species <sup>a</sup> | Seasonal habitat <sup>b</sup> | Resource Potential Diversity (10 percentile interval) <sup>c</sup> |       |       |       |       |       |       |       |       |        |
|----------------------|-------------------------------|--------------------------------------------------------------------|-------|-------|-------|-------|-------|-------|-------|-------|--------|
|                      |                               | 0–10                                                               | 10–20 | 20–30 | 30–40 | 40–50 | 50–60 | 60–70 | 70–80 | 80–90 | 90–100 |
| Wolf                 | Growing                       | 3.4                                                                | 4.6   | 4.8   | 5.8   | 10.6  | 12.0  | 14.4  | 15.3  | 16.2  | 12.9   |
|                      | Winter                        | 1.9                                                                | 3.6   | 4.3   | 4.6   | 10.2  | 13.3  | 15.1  | 14.7  | 16.7  | 15.7   |
| Grizzly              | Early-Gr                      | 7.3                                                                | 8.5   | 9.6   | 10.1  | 11.2  | 9.6   | 13.3  | 13.4  | 10.5  | 6.5    |
|                      | Mid-Gr                        | 7.1                                                                | 8.5   | 9.3   | 9.7   | 12.1  | 10.0  | 12.8  | 12.6  | 10.7  | 7.0    |
|                      | Late-Gr                       | 6.0                                                                | 7.2   | 7.8   | 8.7   | 10.9  | 10.2  | 13.0  | 14.8  | 12.8  | 8.7    |
| Elk                  | Growing                       | 4.7                                                                | 5.4   | 5.9   | 6.9   | 10.2  | 11.0  | 14.6  | 16.4  | 13.6  | 11.3   |
|                      | Winter                        | 0.7                                                                | 1.8   | 2.8   | 3.7   | 7.0   | 11.0  | 17.3  | 18.1  | 18.3  | 19.3   |
| Moose                | Growing                       | 0.6                                                                | 2.8   | 4.6   | 5.4   | 10.2  | 13.3  | 13.6  | 14.1  | 18.5  | 17.0   |
|                      | Winter                        | 0.1                                                                | 1.8   | 2.8   | 2.1   | 6.5   | 12.1  | 15.4  | 15.5  | 20.6  | 23.2   |
| Caribou              | Growing                       | 8.9                                                                | 9.0   | 9.3   | 8.3   | 10.6  | 10.9  | 13.0  | 11.6  | 10.4  | 7.9    |
|                      | Winter                        | 2.7                                                                | 3.4   | 6.0   | 5.5   | 8.4   | 11.1  | 14.8  | 14.6  | 17.2  | 16.3   |
| Goat                 | Growing                       | 20.0                                                               | 18.2  | 24.5  | 10.0  | 8.4   | 7.1   | 6.9   | 3.5   | 0.9   | 0.5    |
|                      | Winter                        | 16.2                                                               | 16.6  | 24.1  | 9.7   | 7.2   | 6.6   | 9.1   | 7.5   | 2.2   | 0.8    |
| Sheep                | Growing                       | 12.6                                                               | 16.4  | 23.4  | 9.8   | 8.0   | 8.1   | 10.9  | 7.5   | 2.4   | 1.0    |
|                      | Winter                        | 10.6                                                               | 15.1  | 22.4  | 8.8   | 7.3   | 8.1   | 13.0  | 9.6   | 3.7   | 1.3    |

<sup>a</sup> Wolf = Gray Wolf, Grizzly = Grizzly Bear, Elk = Rocky Mountain Elk, Caribou = Woodland Caribou, Goat = Mountain Goat, Sheep = Stone's sheep

<sup>b</sup> Winter = winter habitat, Growing = growing-season habitat, Early-Gr = early-growing habitat, Mid-Gr = mid-growing habitat, Late-Gr = late-growing habitat

<sup>c</sup> Ten classes of resource potential diversity with 10 percentile intervals, where the class 0–10 percentiles represents the lowest resource potential and the class 90–100 percentiles represents the highest resource potential. Resource potential diversity is calculated using the Shannon Diversity Index (Magurran 1988) of resource potentials among forest resources, oil and gas, mineral, and wind power

Table S7.3 Area (%) of high-value habitats in 10 classes of road potential within Special Resource Management Zones of the Muskwa-Kechika Management Area, northeast British Columbia, Canada. High-value habitat is assigned to the top 30 percentiles of habitat suitability among 500-ha planning units across the entire land area of the Muskwa-Kechika Management Area

| Species <sup>a</sup> | Seasonal habitat <sup>b</sup> | Road Potential (10 percentile interval) <sup>c</sup> |       |       |       |       |       |       |       |       |        |
|----------------------|-------------------------------|------------------------------------------------------|-------|-------|-------|-------|-------|-------|-------|-------|--------|
|                      |                               | 0–10                                                 | 10–20 | 20–30 | 30–40 | 40–50 | 50–60 | 60–70 | 70–80 | 80–90 | 90–100 |
| Wolf                 | Growing                       | 0.2                                                  | 1.8   | 4.1   | 7.7   | 12.6  | 15.6  | 17.2  | 17.1  | 13.7  | 10.1   |
|                      | Winter                        | 0.1                                                  | 0.6   | 1.3   | 3.8   | 9.9   | 13.2  | 16.0  | 17.6  | 19.0  | 18.4   |
| Grizzly              | Early-Gr                      | 1.3                                                  | 5.5   | 9.8   | 12.9  | 17.0  | 17.4  | 15.6  | 12.2  | 7.0   | 1.2    |
|                      | Mid-Gr                        | 1.2                                                  | 5.6   | 9.7   | 12.9  | 17.3  | 17.5  | 16.1  | 11.8  | 6.8   | 1.1    |
|                      | Late-Gr                       | 0.9                                                  | 4.4   | 7.9   | 11.1  | 15.6  | 18.2  | 17.1  | 14.7  | 8.5   | 1.6    |
| Elk                  | Growing                       | 0.2                                                  | 2.6   | 5.1   | 6.9   | 11.9  | 15.2  | 17.8  | 18.6  | 15.0  | 6.7    |
|                      | Winter                        | 0.1                                                  | 0.7   | 1.3   | 2.3   | 6.7   | 12.7  | 16.3  | 21.2  | 20.7  | 18.0   |
| Moose                | Growing                       | 0.0                                                  | 0.5   | 0.9   | 2.7   | 6.9   | 10.3  | 13.3  | 18.0  | 21.9  | 25.7   |
|                      | Winter                        | 0.0                                                  | 0.1   | 0.3   | 0.9   | 3.5   | 7.4   | 11.8  | 16.8  | 26.5  | 32.7   |
| Caribou              | Growing                       | 1.3                                                  | 5.9   | 9.1   | 12.1  | 15.3  | 15.7  | 15.8  | 13.4  | 8.4   | 3.0    |
|                      | Winter                        | 0.4                                                  | 2.2   | 3.9   | 5.1   | 7.6   | 10.9  | 13.8  | 15.6  | 20.5  | 19.9   |
| Goat                 | Growing                       | 13.1                                                 | 19.9  | 19.2  | 20.2  | 11.1  | 7.9   | 5.9   | 2.4   | 0.3   | 0.0    |
|                      | Winter                        | 11.4                                                 | 17.6  | 15.7  | 17.4  | 12.0  | 12.4  | 6.9   | 4.6   | 1.8   | 0.2    |
| Sheep                | Growing                       | 7.5                                                  | 15.1  | 17.5  | 19.8  | 12.9  | 12.0  | 8.5   | 4.8   | 1.8   | 0.2    |
|                      | Winter                        | 8.8                                                  | 13.9  | 15.2  | 17.1  | 11.6  | 12.8  | 10.5  | 6.7   | 2.7   | 0.7    |

<sup>a</sup> Wolf = Gray Wolf, Grizzly = Grizzly Bear, Elk = Rocky Mountain Elk, Caribou = Woodland Caribou, Goat = Mountain Goat, Sheep = Stone's sheep

<sup>b</sup> Winter = winter habitat, Growing = growing-season habitat, Early-Gr = early-growing habitat, Mid-Gr = mid-growing habitat, Late-Gr = late-growing habitat

<sup>c</sup> Ten classes of road potential with 10 percentile intervals, where the class 0–10 percentiles represents the lowest road potential and the class 90–100 percentiles represents the highest road potential

Table S7.4 Area (%) of high-value habitats in 10 classes of forest resource potential within Special Resource Management Zones of the Muskwa-Kechika Management Area, northeast British Columbia, Canada. High-value habitat is assigned to the top 30 percentiles of habitat suitability among 500-ha planning units across the entire land area of the Muskwa-Kechika Management Area

| Species <sup>a</sup> | Seasonal habitat <sup>b</sup> | Forest Resource Potential (10 percentile interval) <sup>c</sup> |       |       |       |       |       |       |       |       |        |
|----------------------|-------------------------------|-----------------------------------------------------------------|-------|-------|-------|-------|-------|-------|-------|-------|--------|
|                      |                               | 0–10                                                            | 10–20 | 20–30 | 30–40 | 40–50 | 50–60 | 60–70 | 70–80 | 80–90 | 90–100 |
| Wolf                 | Growing                       | 5.7                                                             | 6.6   | 9.7   | 11.7  | 13.5  | 15.5  | 13.6  | 10.7  | 8.7   | 4.3    |
|                      | Winter                        | 2.8                                                             | 3.7   | 6.4   | 8.9   | 12.1  | 14.5  | 13.8  | 12.5  | 12.3  | 12.9   |
| Grizzly              | Early-Gr                      | 15.0                                                            | 10.6  | 13.0  | 13.7  | 12.4  | 11.1  | 10.1  | 7.3   | 4.8   | 2.0    |
|                      | Mid-Gr                        | 13.8                                                            | 10.0  | 12.5  | 13.8  | 12.4  | 11.7  | 11.1  | 7.6   | 5.1   | 2.0    |
|                      | Late-Gr                       | 8.4                                                             | 7.7   | 10.9  | 13.1  | 13.0  | 13.9  | 12.7  | 9.5   | 7.3   | 3.5    |
| Elk                  | Growing                       | 8.7                                                             | 7.1   | 9.5   | 11.4  | 11.8  | 12.3  | 11.8  | 9.1   | 9.3   | 9.0    |
|                      | Winter                        | 1.2                                                             | 2.7   | 6.0   | 9.0   | 12.5  | 15.0  | 14.2  | 14.0  | 13.5  | 11.8   |
| Moose                | Growing                       | 1.5                                                             | 3.0   | 3.4   | 3.2   | 6.3   | 10.1  | 12.4  | 16.7  | 19.0  | 24.4   |
|                      | Winter                        | 1.7                                                             | 2.8   | 3.2   | 3.8   | 6.6   | 9.8   | 12.7  | 17.1  | 19.4  | 22.8   |
| Caribou              | Growing                       | 20.9                                                            | 12.6  | 13.8  | 14.2  | 11.6  | 10.2  | 8.2   | 4.7   | 2.7   | 1.0    |
|                      | Winter                        | 10.1                                                            | 7.2   | 6.3   | 6.9   | 6.7   | 9.1   | 10.9  | 11.9  | 14.1  | 16.7   |
| Goat                 | Growing                       | 58.1                                                            | 20.2  | 12.8  | 6.6   | 1.8   | 0.3   | 0.1   | 0.1   | 0.0   | 0.0    |
|                      | Winter                        | 48.0                                                            | 17.7  | 12.5  | 9.3   | 6.7   | 3.4   | 1.8   | 0.5   | 0.2   | 0.1    |
| Sheep                | Growing                       | 49.7                                                            | 19.2  | 14.2  | 10.0  | 4.7   | 2.0   | 0.1   | 0.0   | 0.0   | 0.0    |
|                      | Winter                        | 45.2                                                            | 17.3  | 13.8  | 11.2  | 7.0   | 4.3   | 1.2   | 0.1   | 0.0   | 0.0    |

<sup>a</sup> Wolf = Gray Wolf, Grizzly = Grizzly Bear, Elk = Rocky Mountain Elk, Caribou = Woodland Caribou, Goat = Mountain Goat, Sheep = Stone's sheep

<sup>b</sup> Winter = winter habitat, Growing = growing-season habitat, Early-Gr = early-growing habitat, Mid-Gr = mid-growing habitat, Late-Gr = late-growing habitat

<sup>c</sup> Ten classes of forest resource potential with 10 percentile intervals, where the class 0–10 percentiles represents the lowest resource potential and the class 90–100 percentiles represents the highest resource potential

Table S7.5 Area (%) of high-value habitats in 10 classes of oil and gas potential within Special Resource Management Zones of the Muskwa-Kechika Management Area, northeast British Columbia, Canada. High-value habitat is assigned to the top 30 percentiles of habitat suitability among 500-ha planning units across the entire land area of the Muskwa-Kechika Management Area

| Species <sup>a</sup> | Seasonal habitat <sup>b</sup> | Oil and Gas Potential (10 percentile interval) <sup>c</sup> |       |       |       |       |       |       |       |       |        |
|----------------------|-------------------------------|-------------------------------------------------------------|-------|-------|-------|-------|-------|-------|-------|-------|--------|
|                      |                               | 0–10                                                        | 10–20 | 20–30 | 30–40 | 40–50 | 50–60 | 60–70 | 70–80 | 80–90 | 90–100 |
| Wolf                 | Growing                       | 35.5                                                        | 2.1   | 5.6   | 5.4   | 6.1   | 5.6   | 9.0   | 13.8  | 11.4  | 5.5    |
|                      | Winter                        | 35.9                                                        | 1.1   | 3.4   | 4.2   | 3.7   | 4.1   | 8.7   | 14.3  | 14.7  | 10.0   |
| Grizzly              | Early-Gr                      | 41.7                                                        | 3.3   | 8.8   | 6.8   | 7.5   | 5.6   | 6.1   | 10.7  | 8.0   | 1.6    |
|                      | Mid-Gr                        | 44.0                                                        | 3.2   | 9.5   | 6.6   | 8.0   | 4.8   | 5.7   | 9.9   | 6.8   | 1.6    |
|                      | Late-Gr                       | 44.4                                                        | 1.8   | 7.0   | 6.5   | 5.4   | 3.3   | 7.7   | 14.4  | 7.9   | 1.6    |
| Elk                  | Growing                       | 34.8                                                        | 2.5   | 6.0   | 3.2   | 6.1   | 4.8   | 6.7   | 20.5  | 10.8  | 4.6    |
|                      | Winter                        | 23.9                                                        | 1.0   | 2.0   | 1.5   | 1.7   | 3.1   | 8.7   | 20.1  | 21.2  | 16.9   |
| Moose                | Growing                       | 37.0                                                        | 1.1   | 2.4   | 5.4   | 5.5   | 4.7   | 5.5   | 15.1  | 10.1  | 13.2   |
|                      | Winter                        | 24.9                                                        | 0.9   | 1.8   | 7.3   | 6.9   | 5.9   | 4.6   | 12.8  | 16.4  | 18.6   |
| Caribou              | Growing                       | 37.2                                                        | 5.3   | 9.1   | 5.4   | 8.0   | 6.5   | 7.4   | 10.3  | 8.5   | 2.4    |
|                      | Winter                        | 23.8                                                        | 2.5   | 4.7   | 4.1   | 6.8   | 7.9   | 7.8   | 13.1  | 15.1  | 14.3   |
| Goat                 | Growing                       | 31.2                                                        | 20.6  | 19.9  | 6.8   | 7.2   | 8.7   | 1.5   | 1.7   | 2.5   | 0.1    |
|                      | Winter                        | 29.9                                                        | 15.7  | 17.4  | 6.6   | 5.3   | 6.8   | 4.1   | 7.6   | 5.9   | 0.8    |
| Sheep                | Growing                       | 21.9                                                        | 19.4  | 19.5  | 7.2   | 7.4   | 9.7   | 3.3   | 5.4   | 5.6   | 0.7    |
|                      | Winter                        | 18.9                                                        | 16.2  | 18.5  | 6.4   | 6.7   | 9.7   | 4.6   | 8.0   | 9.1   | 1.8    |

<sup>a</sup> Wolf = Gray Wolf, Grizzly = Grizzly Bear, Elk = Rocky Mountain Elk, Caribou = Woodland Caribou, Goat = Mountain Goat, Sheep = Stone's sheep

<sup>b</sup> Winter = winter habitat, Growing = growing-season habitat, Early-Gr = early-growing habitat, Mid-Gr = mid-growing habitat, Late-Gr = late-growing habitat

<sup>c</sup> Ten classes of oil and gas potential with 10 percentile intervals, where the class 0–10 percentiles represented the lowest resource potential and the class 90–100 percentiles represented the highest resource potential

Table S7.6 Area (%) of high-value habitats in 10 classes of mineral potential within Special Resource Management Zones of the Muskwa-Kechika Management Area, northeast British Columbia, Canada. High-value habitat is assigned to the top 30 percentiles of habitat suitability among 500-ha planning units across the entire land area of the Muskwa-Kechika Management Area

| Species <sup>a</sup> | Seasonal habitat <sup>b</sup> | Mineral Potential (10 percentile interval) <sup>c</sup> |       |       |       |       |       |       |       |       |        |
|----------------------|-------------------------------|---------------------------------------------------------|-------|-------|-------|-------|-------|-------|-------|-------|--------|
|                      |                               | 0–10                                                    | 10–20 | 20–30 | 30–40 | 40–50 | 50–60 | 60–70 | 70–80 | 80–90 | 90–100 |
| Wolf                 | Growing                       | 10.9                                                    | 14.1  | 10.0  | 10.7  | 17.0  | 11.2  | 9.6   | 6.4   | 2.9   | 7.2    |
|                      | Winter                        | 15.4                                                    | 14.1  | 9.6   | 14.4  | 17.5  | 9.1   | 8.9   | 3.2   | 2.4   | 5.5    |
| Grizzly              | Early-Gr                      | 7.0                                                     | 15.1  | 10.0  | 9.1   | 13.0  | 12.6  | 7.6   | 11.0  | 3.4   | 11.1   |
|                      | Mid-Gr                        | 7.1                                                     | 14.3  | 8.5   | 9.3   | 14.2  | 12.6  | 7.9   | 10.9  | 3.6   | 11.5   |
|                      | Late-Gr                       | 6.2                                                     | 13.6  | 10.9  | 9.6   | 14.3  | 11.6  | 8.0   | 9.6   | 3.5   | 12.7   |
| Elk                  | Growing                       | 7.8                                                     | 16.8  | 12.8  | 9.6   | 11.3  | 12.0  | 9.7   | 7.9   | 3.5   | 8.5    |
|                      | Winter                        | 19.4                                                    | 19.1  | 13.4  | 10.9  | 8.4   | 8.7   | 9.0   | 2.9   | 2.4   | 5.9    |
| Moose                | Growing                       | 13.5                                                    | 12.8  | 9.4   | 12.8  | 15.0  | 7.6   | 8.0   | 4.8   | 8.3   | 7.7    |
|                      | Winter                        | 19.3                                                    | 13.7  | 8.2   | 15.4  | 16.7  | 5.1   | 8.0   | 1.9   | 8.0   | 3.7    |
| Caribou              | Growing                       | 8.4                                                     | 14.2  | 9.3   | 9.8   | 14.8  | 14.0  | 8.6   | 9.0   | 3.8   | 8.0    |
|                      | Winter                        | 17.9                                                    | 17.6  | 11.0  | 14.8  | 12.6  | 5.8   | 9.2   | 3.4   | 4.4   | 3.3    |
| Goat                 | Growing                       | 5.4                                                     | 9.6   | 5.0   | 9.3   | 3.4   | 24.2  | 7.8   | 18.4  | 6.9   | 10.0   |
|                      | Winter                        | 4.6                                                     | 12.7  | 9.2   | 7.2   | 2.5   | 21.0  | 7.9   | 18.6  | 6.2   | 10.0   |
| Sheep                | Growing                       | 6.4                                                     | 13.0  | 8.3   | 4.1   | 5.2   | 23.0  | 7.6   | 18.2  | 6.7   | 7.4    |
|                      | Winter                        | 6.3                                                     | 15.6  | 10.2  | 6.8   | 3.5   | 20.7  | 8.1   | 16.4  | 6.4   | 6.0    |

<sup>a</sup> Wolf = Gray Wolf, Grizzly = Grizzly Bear, Elk = Rocky Mountain Elk, Caribou = Woodland Caribou, Goat = Mountain Goat, Sheep = Stone's sheep

<sup>b</sup> Winter = winter habitat, Growing = growing-season habitat, Early-Gr = early-growing habitat, Mid-Gr = mid-growing habitat, Late-Gr = late-growing habitat

<sup>c</sup> Ten classes of mineral potential with 10 percentile intervals, where the class 0–10 percentiles represents the lowest resource potential and the class 90–100 percentiles represents the highest resource potential

Table S7.7 Area (%) of high-value habitats in 10 classes of wind power potential within Special Resource Management Zones of the Muskwa-Kechika Management Area, northeast British Columbia, Canada. High-value habitat is assigned to the top 30 percentiles of habitat suitability among 500-ha planning units across the entire land area of the Muskwa-Kechika Management Area

| Species <sup>a</sup> | Seasonal habitat <sup>b</sup> | Wind Power Potential (10 percentile interval) <sup>c</sup> |       |       |       |       |       |       |       |       |        |
|----------------------|-------------------------------|------------------------------------------------------------|-------|-------|-------|-------|-------|-------|-------|-------|--------|
|                      |                               | 0–10                                                       | 10–20 | 20–30 | 30–40 | 40–50 | 50–60 | 60–70 | 70–80 | 80–90 | 90–100 |
| Wolf                 | Growing                       | 10.5                                                       | 13.2  | 13.4  | 12.8  | 12.0  | 9.4   | 8.8   | 7.3   | 7.1   | 5.5    |
|                      | Winter                        | 8.0                                                        | 9.5   | 11.4  | 10.8  | 11.9  | 9.5   | 10.3  | 9.7   | 9.4   | 9.4    |
| Grizzly              | Early-Gr                      | 20.8                                                       | 20.6  | 15.5  | 11.6  | 9.6   | 6.2   | 4.9   | 4.4   | 4.0   | 2.3    |
|                      | Mid-Gr                        | 19.6                                                       | 20.0  | 15.1  | 12.0  | 10.5  | 6.9   | 5.3   | 4.4   | 3.9   | 2.4    |
|                      | Late-Gr                       | 16.2                                                       | 18.5  | 14.6  | 12.1  | 10.9  | 7.8   | 6.4   | 5.4   | 5.1   | 2.9    |
| Elk                  | Growing                       | 14.5                                                       | 16.7  | 14.5  | 11.1  | 10.2  | 8.6   | 7.0   | 6.4   | 6.5   | 4.5    |
|                      | Winter                        | 8.6                                                        | 10.0  | 12.0  | 10.3  | 10.0  | 10.0  | 9.3   | 9.1   | 9.4   | 11.3   |
| Moose                | Growing                       | 6.1                                                        | 7.2   | 8.3   | 8.4   | 10.6  | 11.4  | 11.0  | 13.2  | 11.7  | 12.0   |
|                      | Winter                        | 4.1                                                        | 5.2   | 7.5   | 7.3   | 10.6  | 9.7   | 12.2  | 13.8  | 13.4  | 16.1   |
| Caribou              | Growing                       | 19.6                                                       | 20.6  | 15.2  | 11.3  | 9.1   | 7.4   | 5.1   | 4.4   | 4.5   | 2.9    |
|                      | Winter                        | 11.9                                                       | 12.5  | 10.9  | 8.5   | 9.7   | 7.9   | 8.8   | 9.7   | 8.8   | 11.3   |
| Goat                 | Growing                       | 46.4                                                       | 34.3  | 12.1  | 3.5   | 1.6   | 1.2   | 0.6   | 0.2   | 0.1   | 0.0    |
|                      | Winter                        | 50.0                                                       | 32.9  | 10.2  | 3.3   | 1.6   | 1.1   | 0.4   | 0.3   | 0.0   | 0.0    |
| Sheep                | Growing                       | 44.5                                                       | 33.4  | 12.3  | 4.2   | 2.7   | 1.4   | 1.0   | 0.3   | 0.1   | 0.0    |
|                      | Winter                        | 45.3                                                       | 31.6  | 12.3  | 4.9   | 2.5   | 1.5   | 0.9   | 0.6   | 0.3   | 0.0    |

<sup>a</sup> Wolf = Gray Wolf, Grizzly = Grizzly Bear, Elk = Rocky Mountain Elk, Caribou = Woodland Caribou, Goat = Mountain Goat, Sheep = Stone's sheep

<sup>b</sup> Winter = winter habitat, Growing = growing-season habitat, Early-Gr = early-growing habitat, Mid-Gr = mid-growing habitat, Late-Gr = late-growing habitat

<sup>c</sup> Ten classes of wind power potential with 10 percentile intervals, where the class 0–10 percentiles represents the lowest resource potential and the class 90–100 percentiles represents the highest resource potential.

Table S7.8 Areas of highest resource potential (top 30 percentiles shown in 3 classes) within Special Resource Management Zones of the Muskwa-Kechika Management Area, northeast British Columbia, Canada. Area is expressed as % area of the entire Muskwa-Kechika Management Area and given in hectares in parentheses

| Resource Potential           | Top 30 percentiles in 3 classes of resource potential |                  |                  | Top 30 percentiles (70-100) |
|------------------------------|-------------------------------------------------------|------------------|------------------|-----------------------------|
|                              | 70-80                                                 | 80-90            | 90-100           |                             |
| Forest Resources             | 6.0<br>(380,099)                                      | 5.6<br>(359,702) | 5.8<br>(369,886) | 17.4<br>(1,109,687)         |
| Oil and Gas                  | 5.0<br>(317,897)                                      | 4.8<br>(303,312) | 4.3<br>(273,594) | 14.0<br>(894,803)           |
| Minerals                     | 5.3<br>(339,392)                                      | 3.8<br>(240,224) | 5.5<br>(351,760) | 14.6<br>(93,1376)           |
| Wind Power                   | 4.5<br>(289,279)                                      | 4.3<br>(277,375) | 4.3<br>(272,210) | 13.1<br>(838,863)           |
| Cumulative Resources         | 6.8<br>(433,339)                                      | 7.2<br>(458,031) | 6.8<br>(433,449) | 20.8<br>(1,324,818)         |
| Resource Potential Diversity | 6.9<br>(441,279)                                      | 7.2<br>(460,958) | 7.2<br>(462,160) | 21.4<br>(1,364,396)         |
| Roads                        | 7.6<br>(483,530)                                      | 7.8<br>(498,096) | 7.8<br>(497,384) | 23.2<br>(1,479,011)         |

Table S7.9 Areas of overlap between high-value habitats by season for 7 species of large mammals and high cumulative resource potential, high resource potential diversity, and high road potential in Special Resource Management Zones of the Muskwa-Kechika Management Area, British Columbia, Canada. Areas of overlap are expressed as % area of the entire Muskwa-Kechika Management Area. High-value habitat is assigned to the top 30 percentiles of habitat suitability among 500-ha planning units across the entire land area of the Muskwa-Kechika Management Area

| Resource Potential           | Species <sup>a</sup> | Season <sup>b</sup> | Top 30 percentiles of resource potential in 3 classes <sup>c</sup> |       |        |                             |
|------------------------------|----------------------|---------------------|--------------------------------------------------------------------|-------|--------|-----------------------------|
|                              |                      |                     | 70–80                                                              | 80–90 | 90–100 | Top 30 percentiles (70–100) |
| Cumulative Resources         | Wolf                 | Growing             | 2.8                                                                | 2.6   | 1.6    | 7.0                         |
| Cumulative Resources         | Wolf                 | Winter              | 3.7                                                                | 3.6   | 3.1    | 10.4                        |
| Cumulative Resources         | Grizzly              | Early-Growing       | 1.8                                                                | 1.1   | 0.3    | 3.2                         |
| Cumulative Resources         | Gizzly               | Mid-Growing         | 1.8                                                                | 1.2   | 0.3    | 3.2                         |
| Cumulative Resources         | Grizzly              | Late-Growing        | 2.2                                                                | 1.7   | 0.7    | 4.6                         |
| Cumulative Resources         | Elk                  | Growing             | 2.3                                                                | 2.4   | 1.8    | 6.5                         |
| Cumulative Resources         | Elk                  | Winter              | 2.9                                                                | 3.7   | 4.8    | 11.4                        |
| Cumulative Resources         | Moose                | Growing             | 3.5                                                                | 4.2   | 4.9    | 12.7                        |
| Cumulative Resources         | Moose                | Winter              | 3.8                                                                | 5.2   | 6.6    | 15.6                        |
| Cumulative Resources         | Caribou              | Growing             | 1.6                                                                | 1.0   | 0.3    | 2.8                         |
| Cumulative Resources         | Caribou              | Winter              | 3.1                                                                | 3.3   | 4.0    | 10.4                        |
| Cumulative Resources         | Goat                 | Growing             | 0.1                                                                | 0.0   | 0.0    | 0.1                         |
| Cumulative Resources         | Goat                 | Winter              | 0.3                                                                | 0.1   | 0.0    | 0.4                         |
| Cumulative Resources         | Sheep                | Growing             | 0.2                                                                | 0.0   | 0.0    | 0.2                         |
| Cumulative Resources         | Sheep                | Winter              | 0.5                                                                | 0.1   | 0.0    | 0.7                         |
| Resource Potential Diversity | Wolf                 | Growing             | 3.1                                                                | 3.2   | 2.6    | 8.9                         |
| Resource Potential Diversity | Wolf                 | Winter              | 3.1                                                                | 3.6   | 3.4    | 10.0                        |
| Resource Potential Diversity | Grizzly              | Early-Growing       | 2.2                                                                | 1.7   | 1.1    | 4.9                         |
| Resource Potential Diversity | Grizzly              | Mid-Growing         | 2.1                                                                | 1.8   | 1.1    | 5.0                         |
| Resource Potential Diversity | Grizzly              | Late-Growing        | 2.5                                                                | 2.2   | 1.5    | 6.1                         |
| Resource Potential Diversity | Elk                  | Growing             | 3.0                                                                | 2.5   | 2.1    | 7.5                         |
| Resource Potential Diversity | Elk                  | Winter              | 3.6                                                                | 3.6   | 3.8    | 11.0                        |
| Resource Potential Diversity | Moose                | Growing             | 2.8                                                                | 3.7   | 3.4    | 10.0                        |
| Resource Potential Diversity | Moose                | Winter              | 3.4                                                                | 4.6   | 5.1    | 13.1                        |
| Resource Potential Diversity | Caribou              | Growing             | 2.0                                                                | 1.8   | 1.4    | 5.2                         |
| Resource Potential Diversity | Caribou              | Winter              | 2.9                                                                | 3.4   | 3.2    | 9.4                         |
| Resource Potential Diversity | Goat                 | Growing             | 0.4                                                                | 0.1   | 0.1    | 0.6                         |
| Resource Potential Diversity | Goat                 | Winter              | 0.9                                                                | 0.3   | 0.1    | 1.2                         |
| Resource Potential Diversity | Sheep                | Growing             | 1.0                                                                | 0.3   | 0.1    | 1.4                         |
| Resource Potential Diversity | Sheep                | Winter              | 1.2                                                                | 0.5   | 0.2    | 1.9                         |

|                |         |               |     |     |     |      |
|----------------|---------|---------------|-----|-----|-----|------|
| Road Potential | Wolf    | Growing       | 3.4 | 2.7 | 2.0 | 8.2  |
| Road Potential | Wolf    | Winter        | 3.8 | 4.0 | 3.9 | 11.7 |
| Road Potential | Grizzly | Early-Growing | 2.0 | 1.1 | 0.2 | 3.3  |
| Road Potential | Grizzly | Mid-Growing   | 1.9 | 1.1 | 0.2 | 3.2  |
| Road Potential | Grizzly | Late-Growing  | 2.5 | 1.4 | 0.3 | 4.2  |
| Road Potential | Elk     | Growing       | 3.4 | 2.7 | 1.2 | 7.4  |
| Road Potential | Elk     | Winter        | 4.2 | 4.1 | 3.6 | 11.8 |
| Road Potential | Moose   | Growing       | 3.6 | 4.4 | 5.2 | 13.2 |
| Road Potential | Moose   | Winter        | 3.7 | 5.9 | 7.3 | 16.8 |
| Road Potential | Caribou | Growing       | 2.3 | 1.5 | 0.5 | 4.3  |
| Road Potential | Caribou | Winter        | 3.1 | 4.0 | 3.9 | 11.0 |
| Road Potential | Goat    | Growing       | 0.3 | 0.0 | 0.0 | 0.3  |
| Road Potential | Goat    | Winter        | 0.6 | 0.2 | 0.0 | 0.8  |
| Road Potential | Sheep   | Growing       | 0.6 | 0.2 | 0.0 | 0.9  |
| Road Potential | Sheep   | Winter        | 0.9 | 0.3 | 0.1 | 1.3  |

<sup>a</sup> Wolf = Gray Wolf, Grizzly = Grizzly Bear, Elk = Rocky Mountain Elk, Caribou = Woodland Caribou, Goat = Mountain Goat, Sheep = Stone's sheep

<sup>b</sup> Winter = winter habitat, Growing = growing-season habitat, Early-Gr = early-growing habitat, Mid-Gr = mid-growing habitat, Late-Gr = late-growing habitat

<sup>c</sup> Top 30 percentiles of resource potential (high resource potential) among 500-ha planning units across the entire land area of the Muskwa-Kechika Management Area

Table S7.10 Areas of overlap between high-value habitats by season for 7 species of large mammals and high resource potentials for forest resources, oil and gas, minerals, and wind power in Special Resource Management Zones of the Muskwa-Kechika Management Area, British Columbia, Canada. Areas of overlap are expressed as % area of the entire Muskwa-Kechika Management Area. High-value habitat is assigned to the top 30 percentiles of habitat suitability among 500-ha planning units across the entire land area of the Muskwa-Kechika Management Area

| Resource Potential | Species <sup>a</sup> | Season <sup>b</sup> | Top 30 percentiles<br>of resource potential<br>in 3 classes <sup>c</sup> |           |            | Top 30<br>percentiles<br>(70-100) |
|--------------------|----------------------|---------------------|--------------------------------------------------------------------------|-----------|------------|-----------------------------------|
|                    |                      |                     | 70–<br>80                                                                | 80–<br>90 | 90–<br>100 |                                   |
| Forest Resources   | Wolf                 | Growing             | 2.1                                                                      | 1.7       | 0.9        | 4.7                               |
| Forest Resources   | Wolf                 | Winter              | 2.7                                                                      | 2.6       | 2.7        | 8.1                               |
| Forest Resources   | Grizzly              | Early-Growing       | 1.2                                                                      | 0.8       | 0.3        | 2.3                               |
| Forest Resources   | Grizzly              | Mid-Growing         | 1.2                                                                      | 0.8       | 0.3        | 2.4                               |
| Forest Resources   | Grizzly              | Late-Growing        | 1.6                                                                      | 1.2       | 0.6        | 3.4                               |
| Forest Resources   | Elk                  | Growing             | 1.7                                                                      | 1.7       | 1.7        | 5.0                               |
| Forest Resources   | Elk                  | Winter              | 2.8                                                                      | 2.7       | 2.3        | 7.8                               |
| Forest Resources   | Moose                | Growing             | 3.3                                                                      | 3.8       | 4.9        | 12.1                              |
| Forest Resources   | Moose                | Winter              | 3.8                                                                      | 4.3       | 5.1        | 13.2                              |
| Forest Resources   | Caribou              | Growing             | 0.8                                                                      | 0.5       | 0.2        | 1.5                               |
| Forest Resources   | Caribou              | Winter              | 2.3                                                                      | 2.8       | 3.3        | 8.4                               |
| Forest Resources   | Goat                 | Growing             | 0.0                                                                      | 0.0       | 0.0        | 0.0                               |
| Forest Resources   | Goat                 | Winter              | 0.1                                                                      | 0.0       | 0.0        | 0.1                               |
| Forest Resources   | Sheep                | Growing             | 0.0                                                                      | 0.0       | 0.0        | 0.0                               |
| Forest Resources   | Sheep                | Winter              | 0.0                                                                      | 0.0       | 0.0        | 0.0                               |
| Oil and Gas        | Wolf                 | Growing             | 2.8                                                                      | 2.3       | 1.1        | 6.1                               |
| Oil and Gas        | Wolf                 | Winter              | 3.0                                                                      | 3.1       | 2.1        | 8.3                               |
| Oil and Gas        | Grizzly              | Early-Growing       | 1.7                                                                      | 1.3       | 0.3        | 3.3                               |
| Oil and Gas        | Grizzly              | Mid-Growing         | 1.6                                                                      | 1.1       | 0.3        | 3.0                               |
| Oil and Gas        | Grizzly              | Late-Growing        | 2.4                                                                      | 1.3       | 0.3        | 4.0                               |
| Oil and Gas        | Elk                  | Growing             | 3.7                                                                      | 2.0       | 0.8        | 6.6                               |
| Oil and Gas        | Elk                  | Winter              | 4.0                                                                      | 4.2       | 3.3        | 11.5                              |
| Oil and Gas        | Moose                | Growing             | 3.0                                                                      | 2.0       | 2.7        | 7.7                               |
| Oil and Gas        | Moose                | Winter              | 2.8                                                                      | 3.6       | 4.1        | 10.6                              |
| Oil and Gas        | Caribou              | Growing             | 1.8                                                                      | 1.5       | 0.4        | 3.7                               |
| Oil and Gas        | Caribou              | Winter              | 2.6                                                                      | 3.0       | 2.8        | 8.3                               |
| Oil and Gas        | Goat                 | Growing             | 0.2                                                                      | 0.3       | 0.0        | 0.5                               |
| Oil and Gas        | Goat                 | Winter              | 0.9                                                                      | 0.7       | 0.1        | 1.7                               |
| Oil and Gas        | Sheep                | Growing             | 0.7                                                                      | 0.7       | 0.1        | 1.5                               |
| Oil and Gas        | Sheep                | Winter              | 1.0                                                                      | 1.2       | 0.2        | 2.4                               |
| Minerals           | Wolf                 | Growing             | 1.3                                                                      | 0.6       | 1.4        | 3.3                               |

|            |         |               |     |     |     |     |
|------------|---------|---------------|-----|-----|-----|-----|
| Minerals   | Wolf    | Winter        | 0.7 | 0.5 | 1.2 | 2.4 |
| Minerals   | Grizzly | Early-Growing | 1.8 | 0.5 | 1.8 | 4.1 |
| Mineral    | Grizzly | Mid-Growing   | 1.8 | 0.6 | 1.9 | 4.2 |
| Minerals   | Grizzly | Late-Growing  | 1.6 | 0.6 | 2.1 | 4.4 |
| Minerals   | Elk     | Growing       | 1.5 | 0.6 | 1.6 | 3.6 |
| Minerals   | Elk     | Winter        | 0.6 | 0.5 | 1.2 | 2.2 |
| Minerals   | Moose   | Growing       | 1.0 | 1.7 | 1.5 | 4.2 |
| Minerals   | Moose   | Winter        | 0.4 | 1.8 | 0.8 | 3.0 |
| Minerals   | Caribou | Growing       | 1.6 | 0.7 | 1.4 | 3.6 |
| Minerals   | Caribou | Winter        | 0.7 | 0.9 | 0.7 | 2.2 |
| Minerals   | Goat    | Growing       | 2.3 | 0.9 | 1.2 | 4.4 |
| Minerals   | Goat    | Winter        | 2.2 | 0.7 | 1.2 | 4.2 |
| Minerals   | Sheep   | Growing       | 2.4 | 0.9 | 1.0 | 4.2 |
| Minerals   | Sheep   | Winter        | 2.1 | 0.8 | 0.8 | 3.6 |
| Wind Power | Wolf    | Growing       | 1.5 | 1.4 | 1.1 | 4.0 |
| Wind Power | Wolf    | Winter        | 2.1 | 2.0 | 2.0 | 6.1 |
| Wind Power | Grizzly | Early-Growing | 0.7 | 0.6 | 0.4 | 1.7 |
| Wind Power | Grizzly | Mid-Growing   | 0.7 | 0.6 | 0.4 | 1.7 |
| Wind Power | Grizzly | Late-Growing  | 0.9 | 0.9 | 0.5 | 2.3 |
| Wind Power | Elk     | Growing       | 1.2 | 1.2 | 0.8 | 3.2 |
| Wind Power | Elk     | Winter        | 1.8 | 1.8 | 2.2 | 5.9 |
| Wind Power | Moose   | Growing       | 2.7 | 2.4 | 2.4 | 7.4 |
| Wind Power | Moose   | Winter        | 3.1 | 3.0 | 3.6 | 9.6 |
| Wind Power | Caribou | Growing       | 0.8 | 0.8 | 0.5 | 2.1 |
| Wind Power | Caribou | Winter        | 1.9 | 1.7 | 2.2 | 5.8 |
| Wind Power | Goat    | Growing       | 0.0 | 0.0 | 0.0 | 0.0 |
| Wind Power | Goat    | Winter        | 0.0 | 0.0 | 0.0 | 0.0 |
| Wind Power | Sheep   | Growing       | 0.0 | 0.0 | 0.0 | 0.1 |
| Wind Power | Sheep   | Winter        | 0.1 | 0.0 | 0.0 | 0.1 |

<sup>a</sup> Wolf = Gray Wolf, Grizzly = Grizzly Bear, Elk = Rocky Mountain Elk, Caribou = Woodland Caribou, Goat = Mountain Goat, Sheep = Stone's sheep

<sup>b</sup> Winter = winter habitat, Growing = growing-season habitat, Early-Gr = early-growing habitat, Mid-Gr = mid-growing habitat, Late-Gr = late-growing habitat

<sup>c</sup> Top 30 percentiles of resource potential (high resource potential) among 500-ha planning units across the entire land area of the Muskwa-Kechika Management Area
