# Supplementary material for: Potential conflict between future development of natural resources and high-value wildlife habitats in boreal landscapes
Source: Springer Nature journal article supplement (doi:10.1007/s10531-016-1219-2), 2016-10-21
Supplement: MOESM8 [file 10955382]

# **Potential Conflict between Future Development of Natural Resources and High-Value Wildlife Habitats in Boreal Landscapes**

## **Biodiversity and Conservation**

**Nobuya Suzuki<sup>1</sup>, Katherine L. Parker<sup>1</sup>**

<sup>1</sup>Natural Resources and Environmental Studies Institute, University of Northern British Columbia, 3333 University Way, Prince George, BC V2N 4Z9, Canada

Nobuya Suzuki (Corresponding Author)  
Email: nobi.suzuki@unbc.ca

## **Online Resource 8. Spatial Distributions of High-Value Wildlife Habitats and Resource Potentials**

Spatial distributions of high-value wildlife habitats in the Muskwa-Kechika Management Area, northeast British Columbia, Canada, overlapping areas with different levels of:

- 1) resource potential diversity (Fig. S8.1 – moose, elk, caribou, and wolves)
- 2) road potential (Fig. S8.2) – moose, elk, caribou, and wolves
- 3) forest resource potential (Fig. S8.3) – moose, elk, caribou, and wolves
- 4) oil and gas potential (Fig. S8.4) – moose, elk, caribou, and wolves
- 5) mineral potential (Fig. S8.5) – mountain goats, Stone's sheep, grizzly bears, and moose
- 6) wind power potential (Fig. S8.6) – moose, elk, caribou, and wolves
- 7) selected resource potentials (Fig. S8.7) – grizzly bears

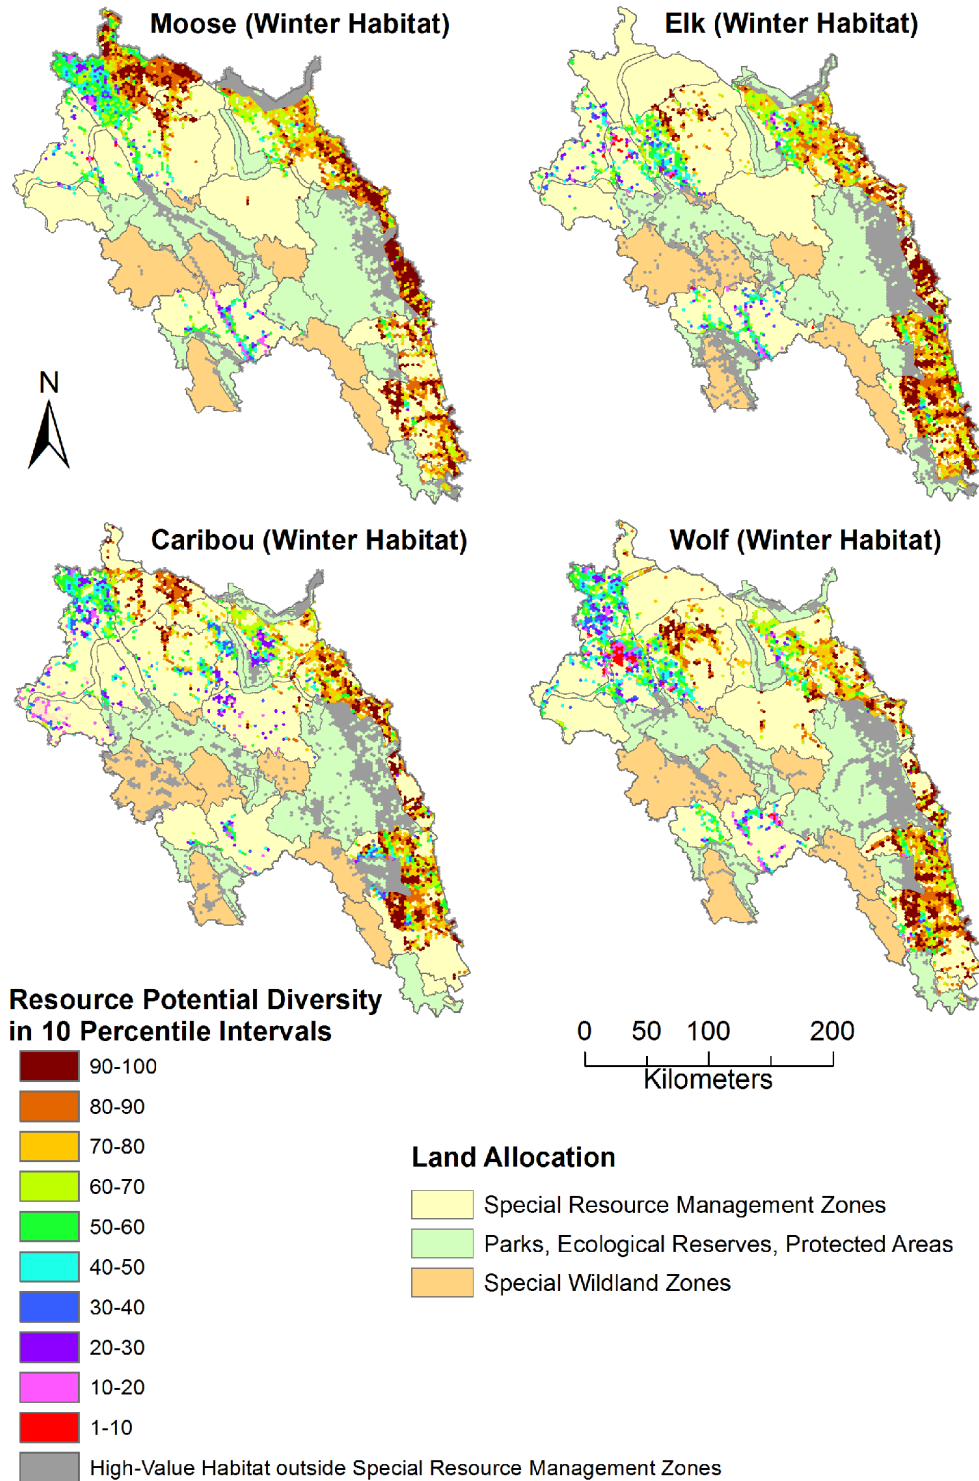

**Fig. S8.1** Resource potential diversity in percentiles from 1 (lowest) to 100 (highest) within high-value habitats for moose, elk, wolves, and caribou in Special Resource Management Zones of the Muskwa-Kechika Management Area, northeast British Columbia, Canada. These species-season combinations showed the most overlap between high-value habitats and high resource potential diversity (top 30 percentiles, Fig. 5)

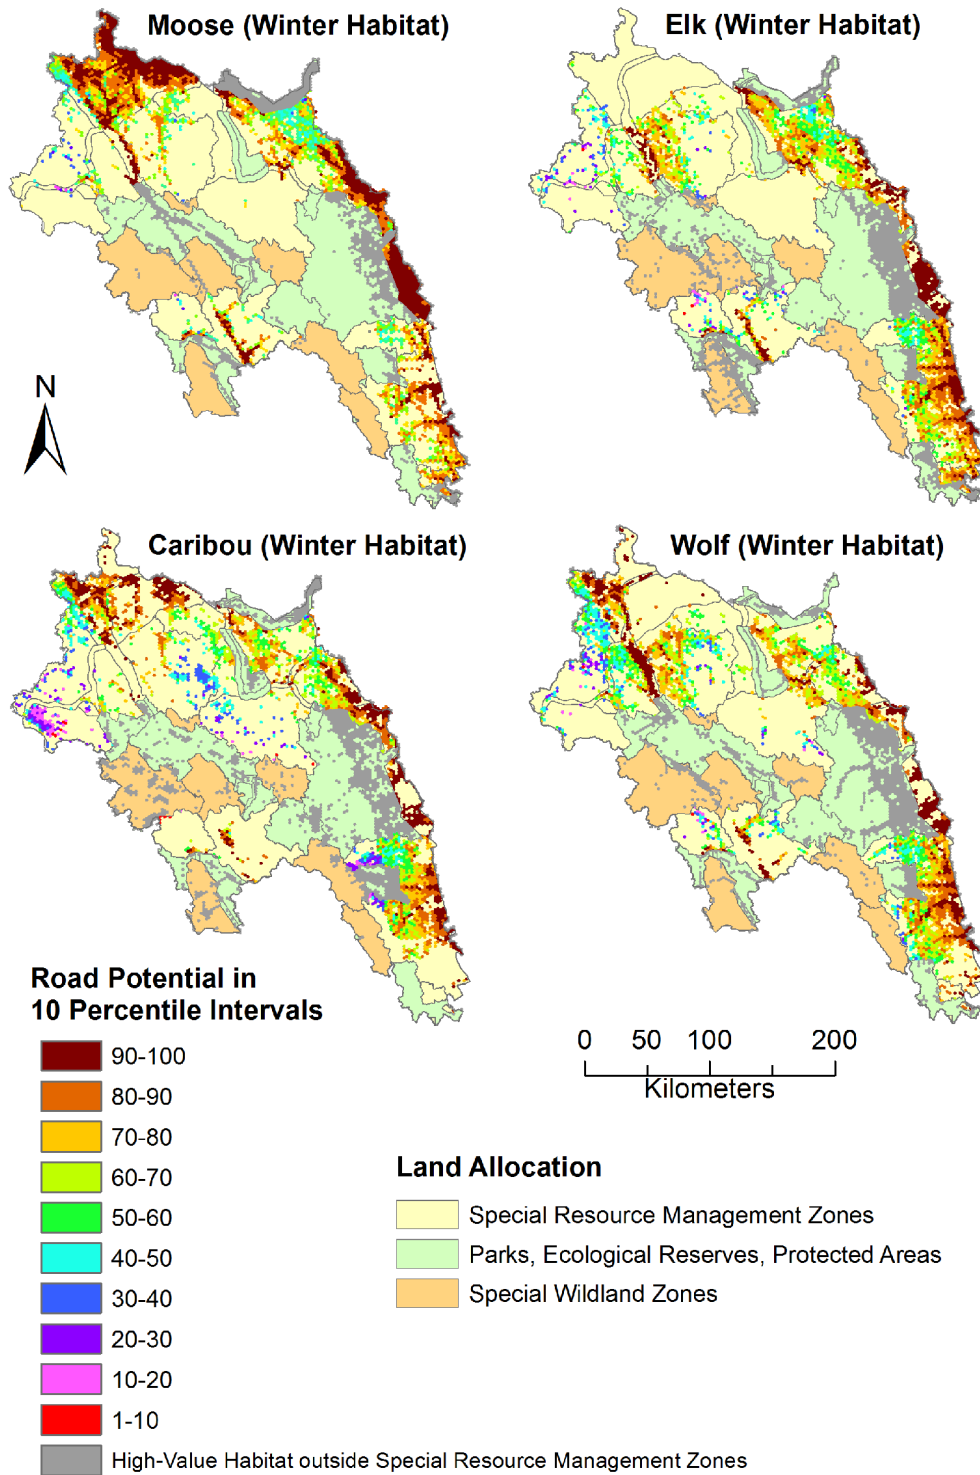

**Fig. S8.2** Road potential in percentiles from 1 (lowest) to 100 (highest) within high-value habitats for moose, elk, caribou, and wolves in Special Resource Management Zones of the Muskwa-Kechika Management Area, northeast British Columbia, Canada. These species-season combinations showed the most overlap between high-value habitats and high road potential (top 30 percentiles, Fig. 5)

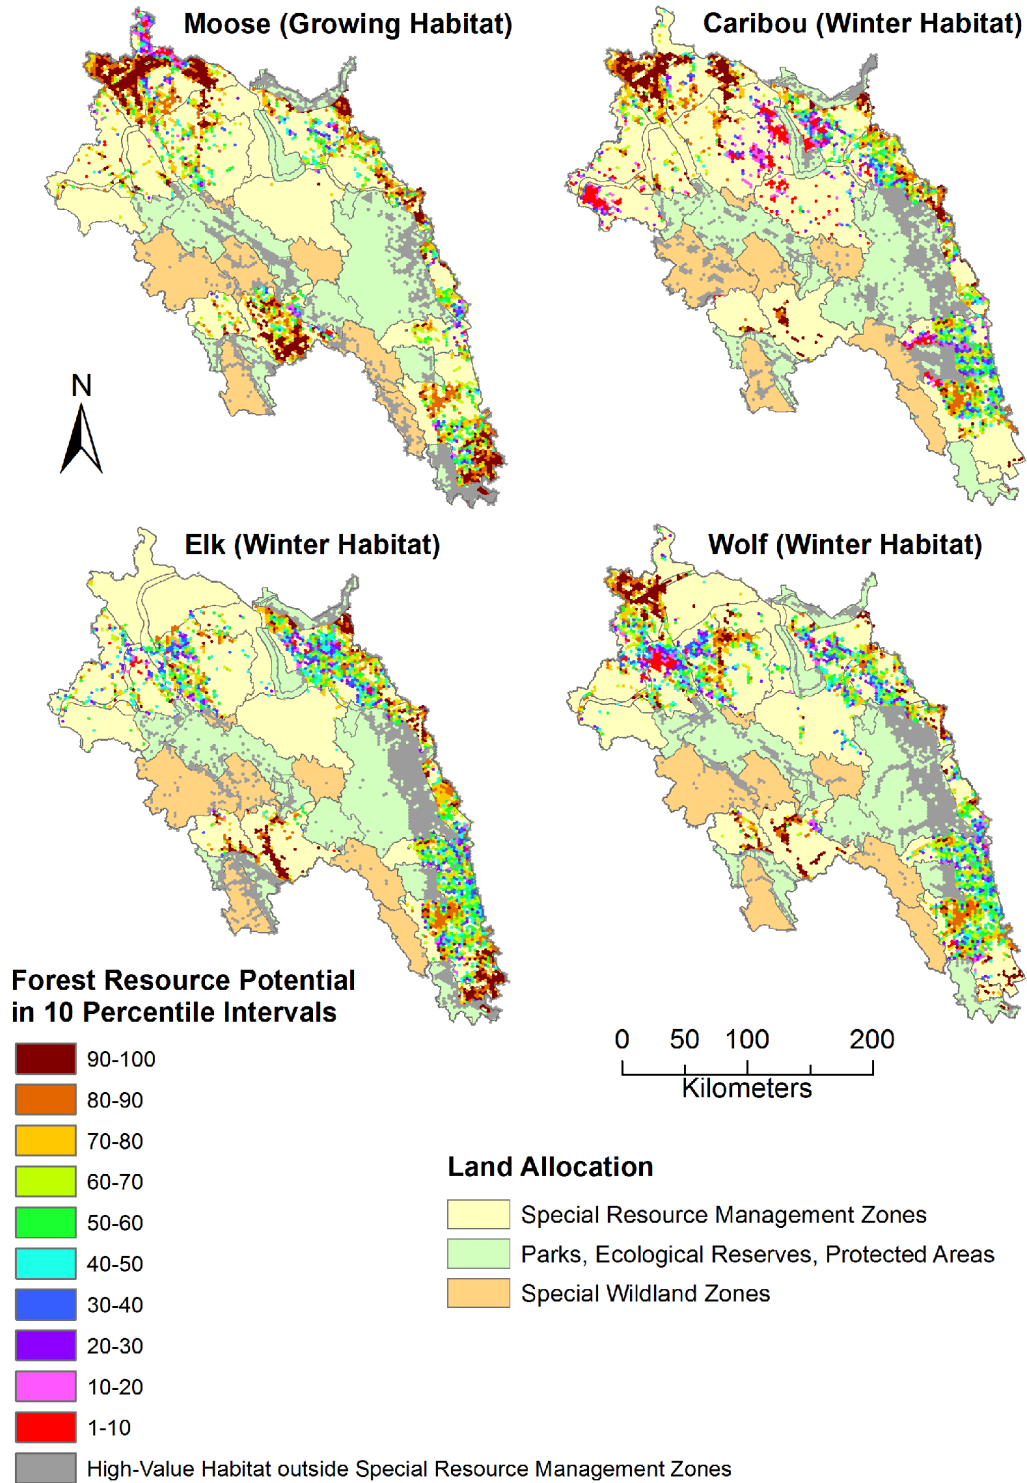

**Fig. S8.3** Forest resource potential in percentiles from 1 (lowest) to 100 (highest) within high-value habitats for moose, caribou, elk, and wolves in Special Resource Management Zones of the Muskwa-Kechika Management Area, northeast British Columbia, Canada. These species-season combinations showed the most overlap between high-value habitats and high forest resource potential (top 30 percentiles, Fig. 5)

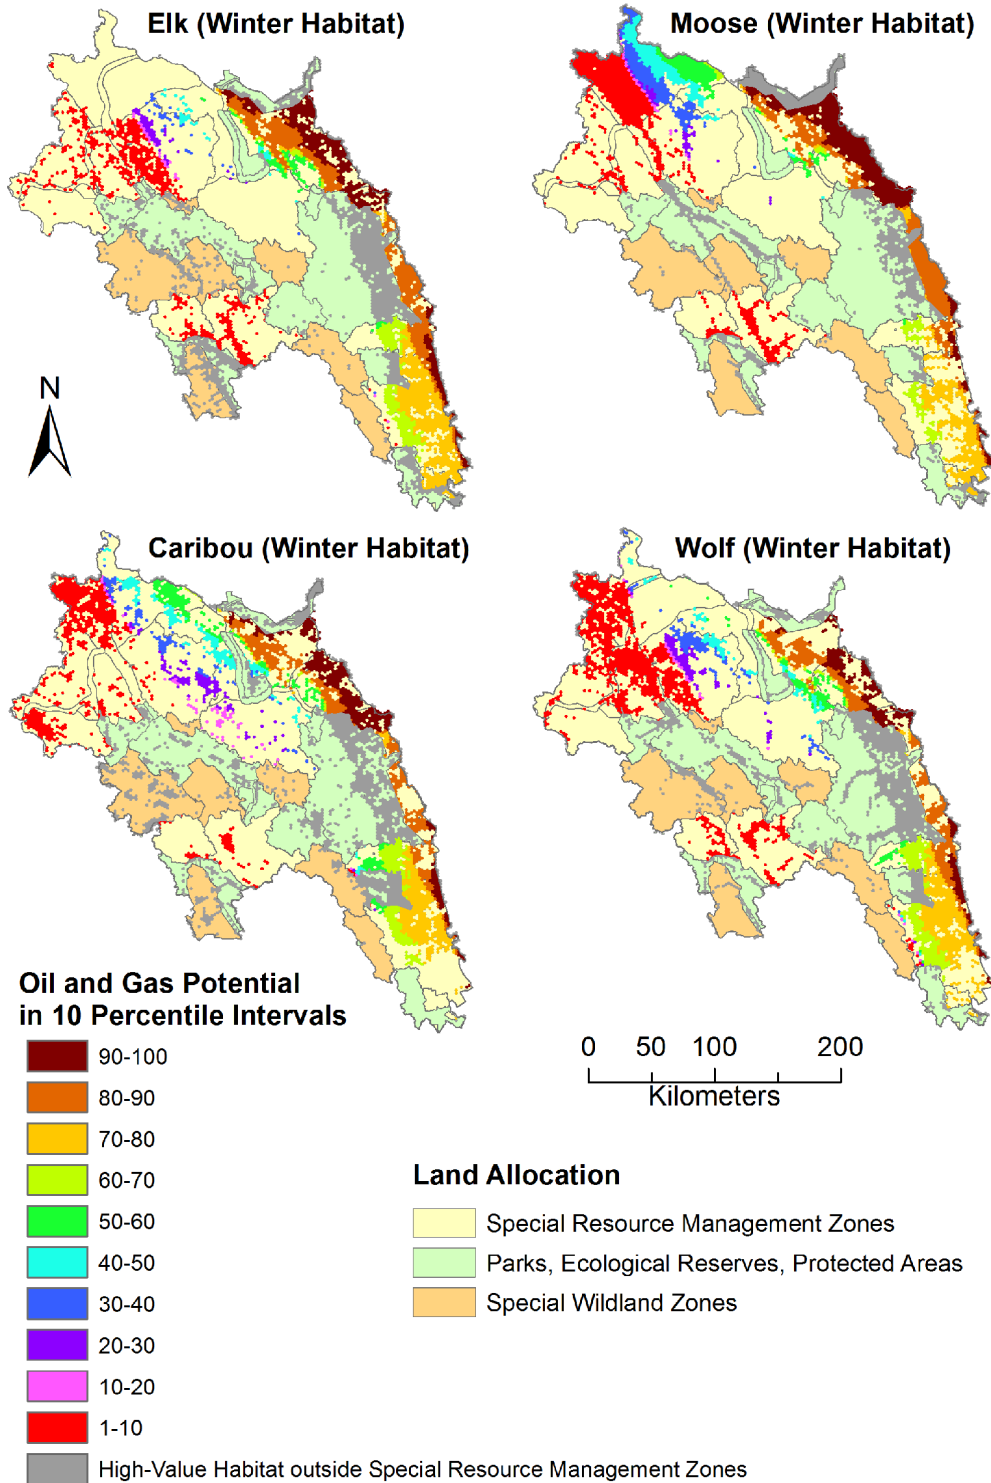

**Fig. S8.4** Oil and gas potential in percentiles from 1 (lowest) to 100 (highest) within high-value habitats for elk, moose, caribou, and wolves in Special Resource Management Zones of the Muskwa-Kechika Management Area, northeast British Columbia, Canada. These species-season combinations showed the most overlap between high-value habitats and high oil and gas potential (top 30 percentiles, Fig. 5)

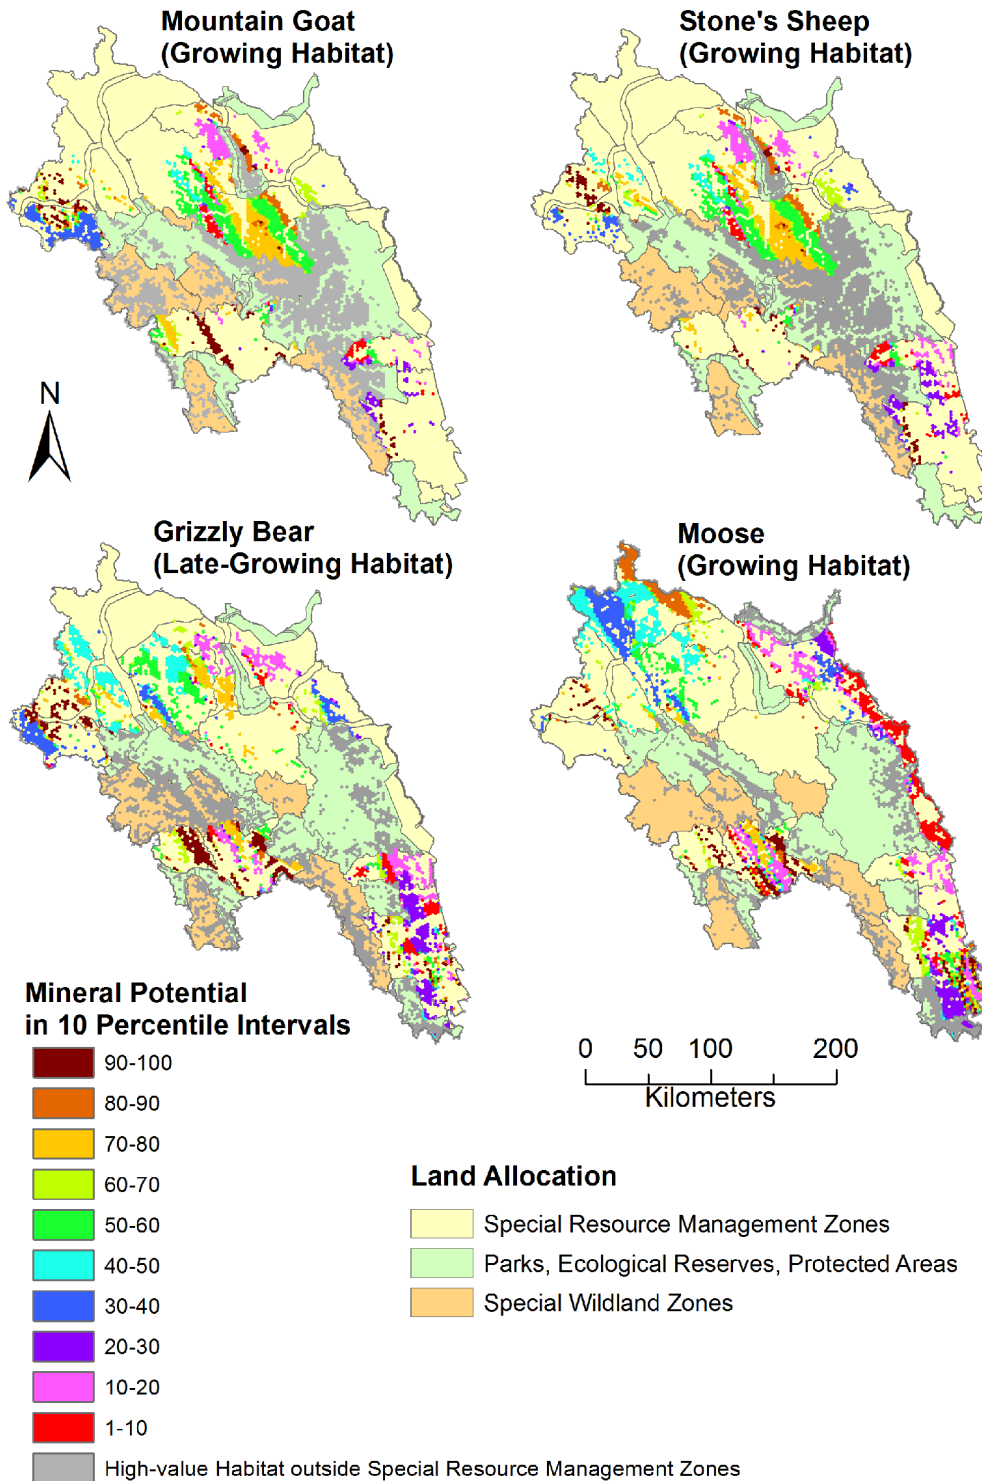

**Fig. S8.5** Mineral potential in percentiles from 1 (lowest) to 100 (highest) within high-value habitats for mountain goats, Stone's sheep, grizzly bears, and moose in Special Resource Management Zones of the Muskwa-Kechika Management Area, northeast British Columbia, Canada. These species-season combinations showed the most overlap between high-value habitats and high mineral potential (top 30 percentiles, Fig. 5)



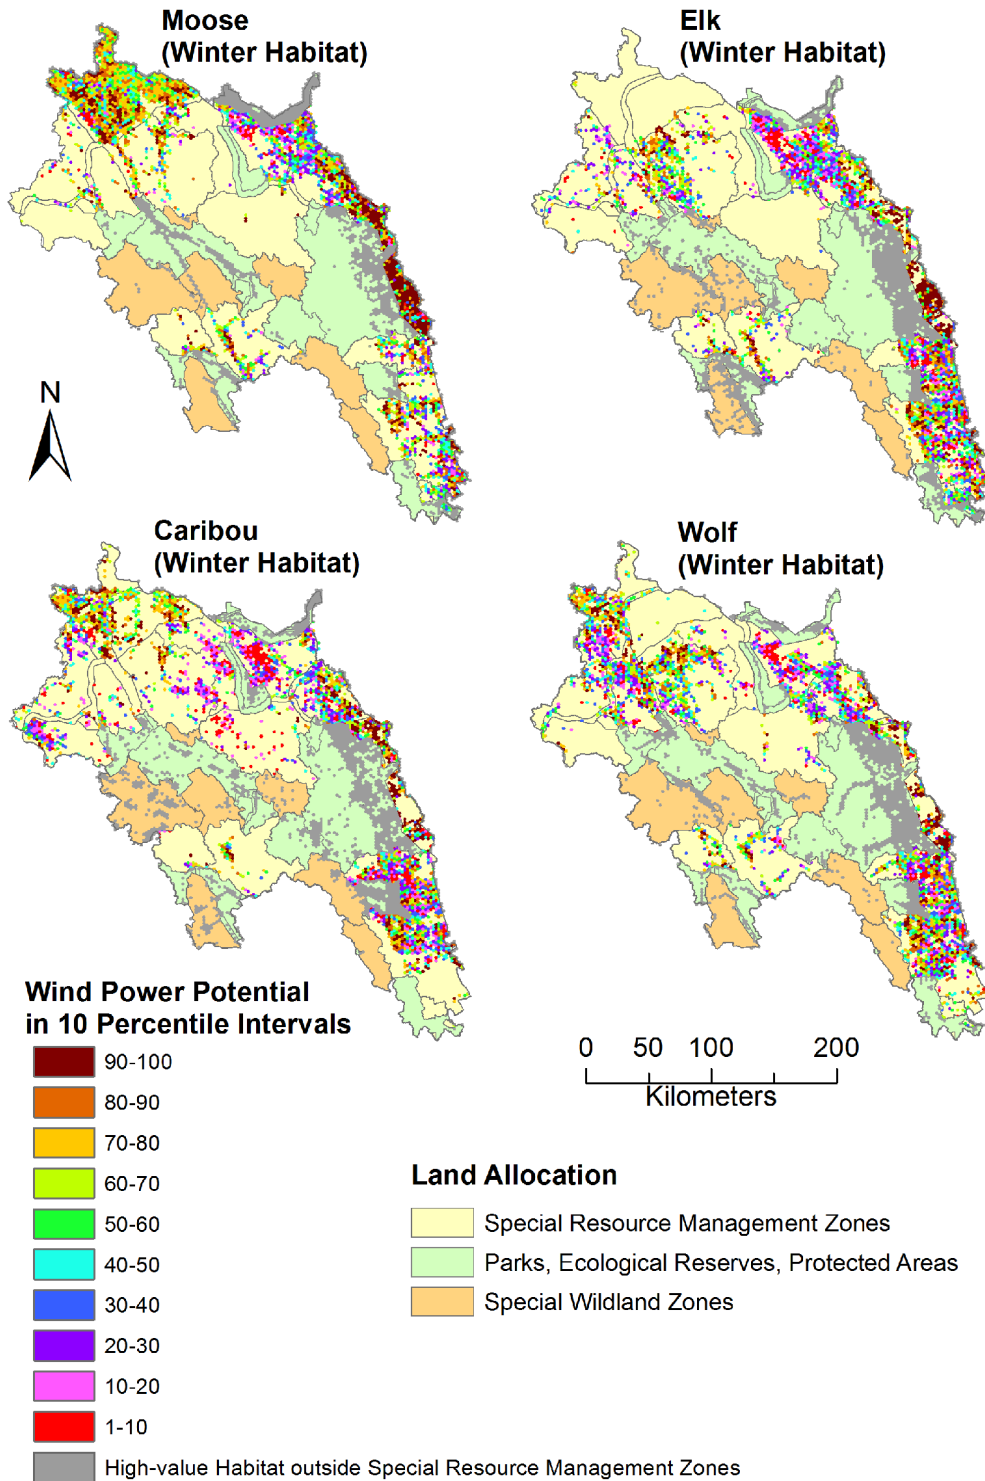

**Fig. S8.6** Wind power potential in percentiles from 1 (lowest) to 100 (highest) within high-value habitats for moose, elk, caribou, and wolves in Special Resource Management Zones of the Muskwa-Kechika Management Area, northeast British Columbia, Canada. These species-season combinations showed the most overlap between high-value habitats and high wind power potential (top 30 percentiles, Fig. 5)

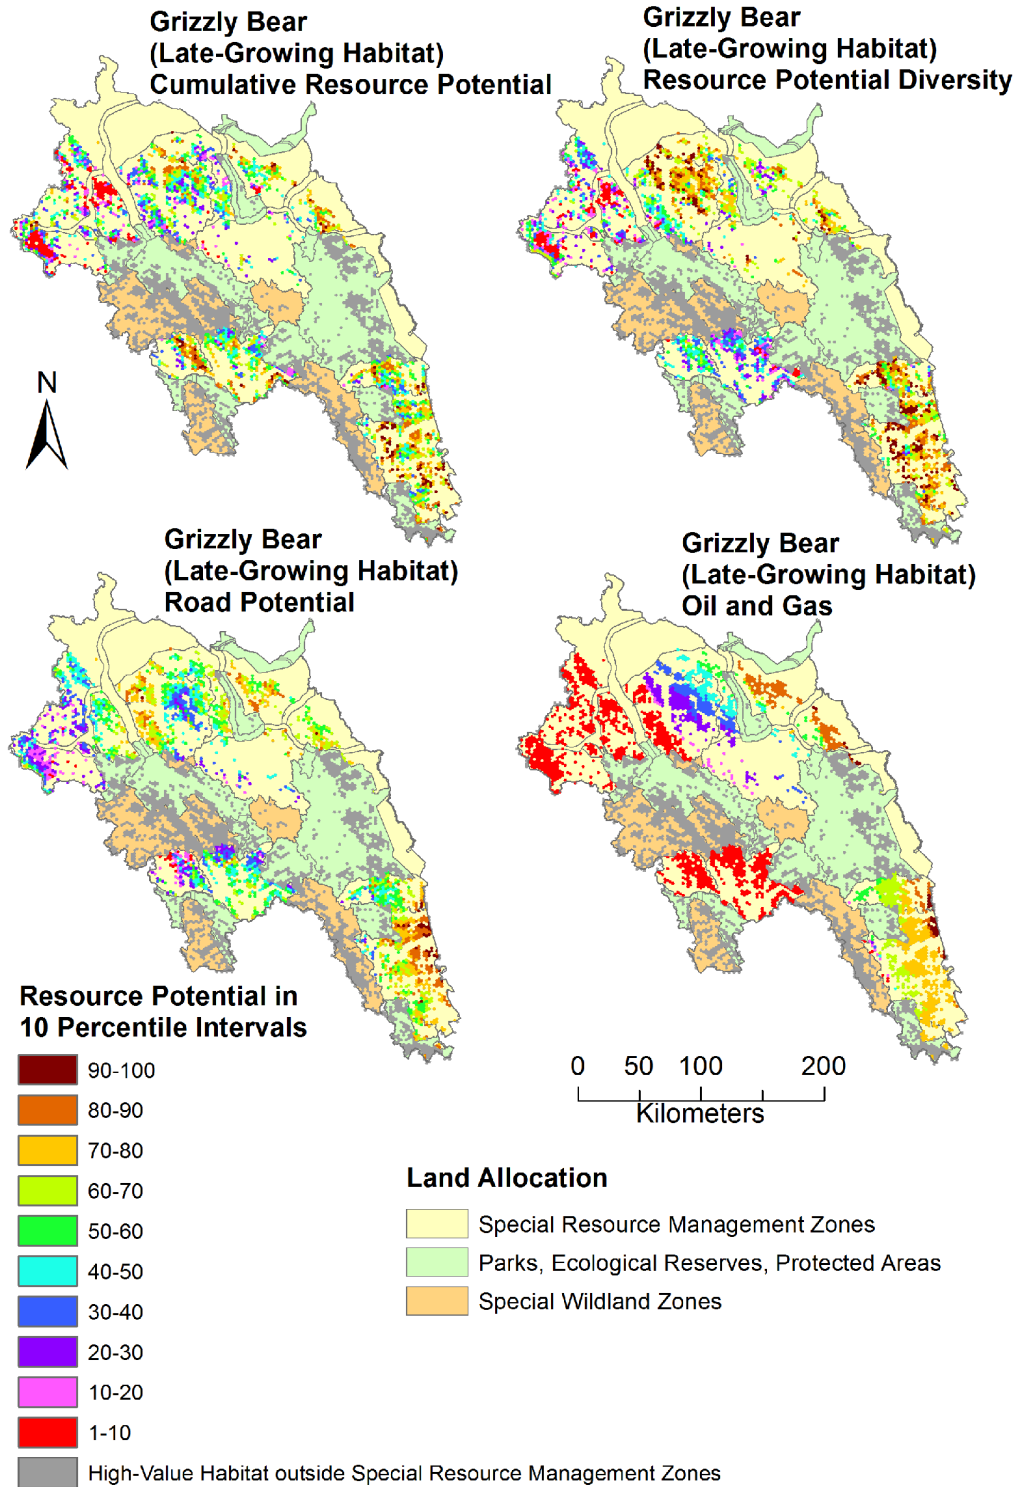

**Fig. S8.7** Four measures of resource potential (cumulative resource potential, resource potential diversity, road potential, and oil and gas potential) in percentiles from 1 (lowest) to 100 (highest) within high-value habitat for grizzly bears in Special Resource Management Zones of the Muskwa-Kechika Management Area, northeastern British Columbia, Canada, in addition to mineral potential already shown (Fig. S8.5)
